# Supplementary material for: Artificial limb representation in amputees
Source: PubMed Central journal article supplement (PMC5917779; doi:10.1093/brain/awy054), 2018-03-09
Supplement: awy054_makin_2017_brain_supp_materials_submitted.pdf [file awy054_makin_2017_brain_supp_materials_submitted.pdf]

## Supplementary materials: Artificial limb representation in amputees

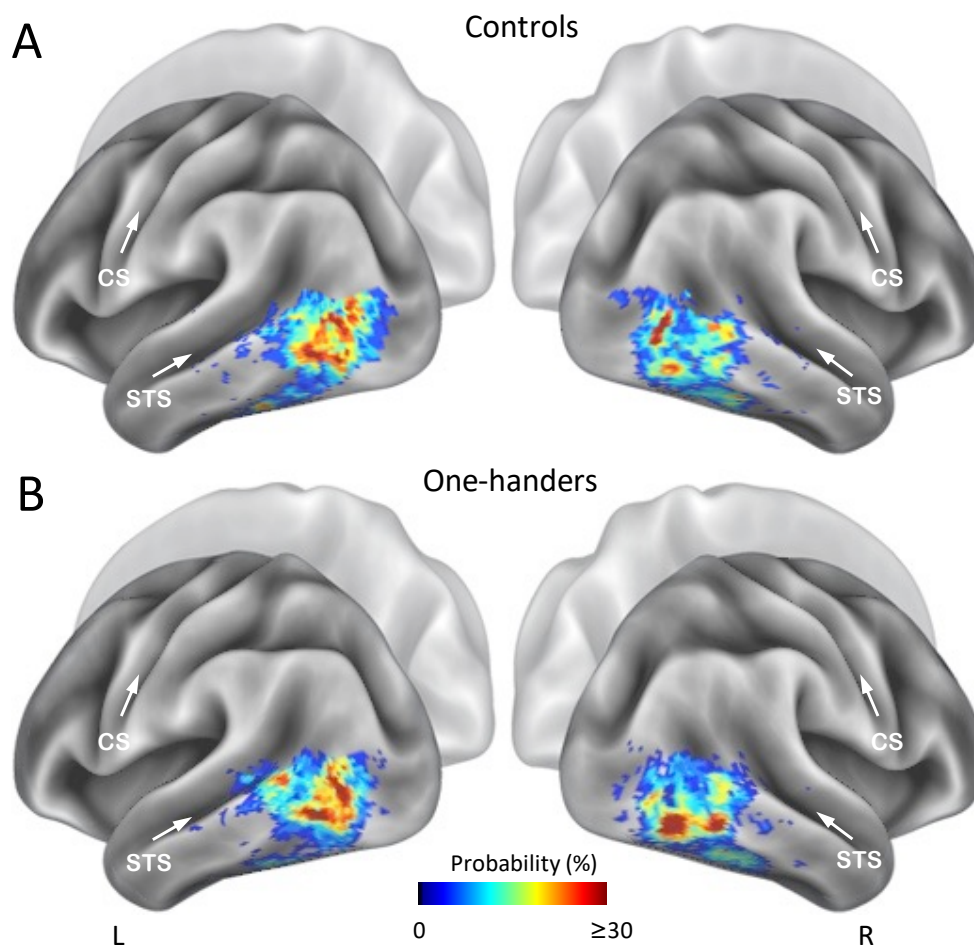

**Supplementary Figure S1. Group probability maps for visual hand-selective regions of interest (ROIs) in control participants (A) and one-handers (B).** All individual visual ROIs were superimposed per group, yielding corresponding probability maps. Warmer colours represent voxels that were included in greater numbers of individual ROIs.

**Supplementary Table S1.** Control participants Prosthesis Observation Log (POL) scores (equivalent to the MAL scores in **Table 1**) and prosthesis observation time in controls (equivalent to usage time in **Table 1**). POL: How frequently these participants observed a person use a prosthesis: 0-1: the scale of the observation frequency (using the same inventory of 27 daily activities as in **Table 1**). Observation time: 1-5: the scale for observation time of seeing a person use a prosthesis: 0=never; 1=rarely; 2=occasionally; 3=daily, less than 4 hours; 4=daily, between 4-8 hours, 5=daily, over 8 hours.

| <i>Subject</i> | <i>Gender</i> | <i>Age</i> | <i>NonDominant<br/>Hand Side</i> | <i>Observation<br/>Frequency<br/>(POL)</i> | <i>Observation<br/>Time</i> |
|----------------|---------------|------------|----------------------------------|--------------------------------------------|-----------------------------|
| PC01           | F             | 70         | Left                             | 0.15                                       | 2                           |
| PC02           | F             | 49         | Left                             | 0.56                                       | 4                           |
| PC03           | M             | 27         | Left                             | 0.17                                       | 1                           |
| PC04           | F             | 36         | Left                             | 0.09                                       | 2                           |
| PC05           | F             | 24         | Left                             | 0.13                                       | 2                           |
| PC06           | M             | 25         | Right                            | 0                                          | 1                           |
| PC07           | F             | 52         | Left                             | 0                                          | 0                           |
| PC08           | F             | 43         | Left                             | 0                                          | 0                           |
| PC10           | F             | 38         | Left                             | 0                                          | 1                           |
| PC11           | M             | 52         | Right                            | 0                                          | 0                           |
| PC12           | M             | 47         | Left                             | 0.09                                       | 1                           |
| PC13           | M             | 41         | Right                            | 0                                          | 1                           |
| PC14           | M             | 49         | Left                             | 0.02                                       | 1                           |
| PC15           | M             | 28         | Right                            | 0                                          | 0                           |
| PC16           | F             | 32         | Left                             | 0.31                                       | 4                           |
| PC17           | F             | 42         | Right                            | 0.02                                       | 2                           |
| PC19           | M             | 44         | Right                            | 0                                          | 0                           |
| PC20           | F             | 40         | Left                             | 0                                          | 0                           |
| PC21           | M             | 52         | Right                            | 0                                          | 0                           |
| PC22           | F             | 62         | Left                             | 0.72                                       | 4                           |
| PC24           | M             | 64         | Right                            | 0.24                                       | 5                           |
| PC09*          | M             | 27         | Left                             |                                            |                             |
| PC18*          | M             | 31         | Left                             |                                            |                             |
| PC23*          | F             | 25         | Left                             |                                            |                             |

\*These participants did not complete the prosthesis observation questionnaires.

**Supplementary Table S2.** Additional information about prosthesis usage and availability in one-handers (Note that neuroimaging data of 31 one-hander was included in the final fMRI analysis). 1 indicates inclusion in the specific class. Subj.=Subject, Pros.=Prosthesis, Cosm.=Cosmetic, Mech.=Mechanic, Myo.=Myoelectric, &=and, Cond.=Condition.

| <i>Subj.</i>      | <i>Pros. owner</i> | <i>Owner but not user</i> | <i>Pros. user: any pros.</i> | <i>Cosm. pros</i> | <i>Active prosthesis</i> |             |                              |                         | <i>Cosm. only</i> | <i>Active only</i> | <i>Both active &amp; cosm.</i> | <i>Pros. in "own" cond.</i> |
|-------------------|--------------------|---------------------------|------------------------------|-------------------|--------------------------|-------------|------------------------------|-------------------------|-------------------|--------------------|--------------------------------|-----------------------------|
|                   |                    |                           |                              |                   | <i>Mech.</i>             | <i>Myo.</i> | <i>Both mech. &amp; mio.</i> | <i>Any active pros.</i> |                   |                    |                                |                             |
| PA01              | 1                  | 0                         | 1                            | 1                 | 0                        | 0           | 0                            | 0                       | 1                 | 0                  | 0                              | 1                           |
| PA02              | 1                  | 0                         | 1                            | 1                 | 0                        | 0           | 0                            | 0                       | 1                 | 0                  | 0                              | 1                           |
| PA03              | 0                  | 0                         | 0                            | 0                 | 0                        | 0           | 0                            | 0                       | 0                 | 0                  | 0                              | 0                           |
| PA04              | 1                  | 0                         | 1                            | 1                 | 1                        | 0           | 0                            | 1                       | 0                 | 0                  | 1                              | 1                           |
| PA06              | 1                  | 0                         | 1                            | 1                 | 1                        | 0           | 0                            | 1                       | 0                 | 0                  | 1                              | 1                           |
| PA07              | 1                  | 0                         | 1                            | 0                 | 1                        | 0           | 0                            | 1                       | 0                 | 1                  | 0                              | 0                           |
| PA08              | 1                  | 0                         | 1                            | 1                 | 1                        | 0           | 0                            | 1                       | 0                 | 0                  | 1                              | 1                           |
| PA09              | 1                  | 0                         | 1                            | 1                 | 1                        | 0           | 0                            | 1                       | 0                 | 0                  | 1                              | 0                           |
| PA10              | 1                  | 1                         | 0                            | 0                 | 0                        | 0           | 0                            | 0                       | 0                 | 0                  | 0                              | 1                           |
| PA11              | 1                  | 0                         | 1                            | 1                 | 1                        | 0           | 0                            | 1                       | 0                 | 0                  | 1                              | 1                           |
| PA12              | 1                  | 0                         | 1                            | 0                 | 1                        | 0           | 0                            | 1                       | 0                 | 1                  | 0                              | 0                           |
| PA13              | 1                  | 1                         | 0                            | 0                 | 0                        | 0           | 0                            | 0                       | 0                 | 0                  | 0                              | 1                           |
| PA14              | 0                  | 0                         | 0                            | 0                 | 0                        | 0           | 0                            | 0                       | 0                 | 0                  | 0                              | 0                           |
| PA15              | 1                  | 0                         | 1                            | 0                 | 1                        | 1           | 1                            | 1                       | 0                 | 1                  | 0                              | 1                           |
| PA16              | 1                  | 0                         | 1                            | 1                 | 0                        | 0           | 0                            | 0                       | 1                 | 0                  | 0                              | 1                           |
| PA17              | 1                  | 1                         | 0                            | 0                 | 0                        | 0           | 0                            | 0                       | 0                 | 0                  | 0                              | 1                           |
| PA18              | 1                  | 0                         | 1                            | 1                 | 0                        | 0           | 0                            | 0                       | 1                 | 0                  | 0                              | 1                           |
| PA19              | 1                  | 0                         | 1                            | 1                 | 0                        | 0           | 0                            | 0                       | 1                 | 0                  | 0                              | 1                           |
| PA20              | 1                  | 0                         | 1                            | 1                 | 0                        | 0           | 0                            | 0                       | 1                 | 0                  | 0                              | 1                           |
| PA21              | 1                  | 0                         | 1                            | 1                 | 0                        | 0           | 0                            | 0                       | 1                 | 0                  | 0                              | 1                           |
| PA22              | 1                  | 0                         | 1                            | 1                 | 0                        | 0           | 0                            | 0                       | 1                 | 0                  | 0                              | 1                           |
| PA23              | 1                  | 0                         | 1                            | 0                 | 1                        | 0           | 0                            | 1                       | 0                 | 1                  | 0                              | 1                           |
| PA24              | 1                  | 0                         | 1                            | 0                 | 0                        | 1           | 0                            | 1                       | 0                 | 1                  | 0                              | 1                           |
| PA25              | 1                  | 0                         | 1                            | 0                 | 0                        | 1           | 0                            | 1                       | 0                 | 1                  | 0                              | 1                           |
| PA27              | 1                  | 0                         | 1                            | 1                 | 0                        | 1           | 0                            | 1                       | 0                 | 0                  | 1                              | 1                           |
| PA28              | 1                  | 0                         | 1                            | 0                 | 0                        | 1           | 0                            | 1                       | 0                 | 1                  | 0                              | 1                           |
| PA29              | 1                  | 0                         | 1                            | 0                 | 1                        | 0           | 0                            | 1                       | 0                 | 1                  | 0                              | 0                           |
| PA30              | 1                  | 0                         | 1                            | 0                 | 1                        | 1           | 1                            | 1                       | 0                 | 1                  | 0                              | 1                           |
| PA31              | 1                  | 0                         | 1                            | 1                 | 0                        | 0           | 0                            | 0                       | 1                 | 0                  | 0                              | 1                           |
| PA32              | 1                  | 0                         | 1                            | 1                 | 0                        | 0           | 0                            | 0                       | 1                 | 0                  | 0                              | 1                           |
| PA33              | 1                  | 0                         | 1                            | 0                 | 1                        | 0           | 0                            | 1                       | 0                 | 1                  | 0                              | 1                           |
| Total (fMRI data) | <b>29</b>          | <b>3</b>                  | <b>26</b>                    | <b>16</b>         | <b>12</b>                | <b>6</b>    | <b>2</b>                     | <b>16</b>               | <b>10</b>         | <b>10</b>          | <b>6</b>                       | <b>25</b>                   |
| PA05*             | 1                  | 0                         | 1                            | 1                 | 1                        | 0           | 0                            | 1                       | 0                 | 0                  | 1                              | 1                           |
| Total             | <b>30</b>          | <b>3</b>                  | <b>27</b>                    | <b>17</b>         | <b>13</b>                | <b>6</b>    | <b>2</b>                     | <b>17</b>               | <b>10</b>         | <b>10</b>          | <b>7</b>                       | <b>26</b>                   |

\*This participant was excluded from the fMRI analysis
